# Supplementary material for: An epigenome-wide study of obesity in African American youth and young adults: novel findings, replication in neutrophils, and relationship with gene expression
Source: PubMed Central journal article supplement (PMC5756368; doi:10.1186/s13148-017-0435-2), 2018-01-05

Additional file 3:

Figure S1. Positions and correlations of the multiple CpG sites in SBNO2, SOCS3, VMP1 and CISH genes

# CpG sites in SBNO2 gene

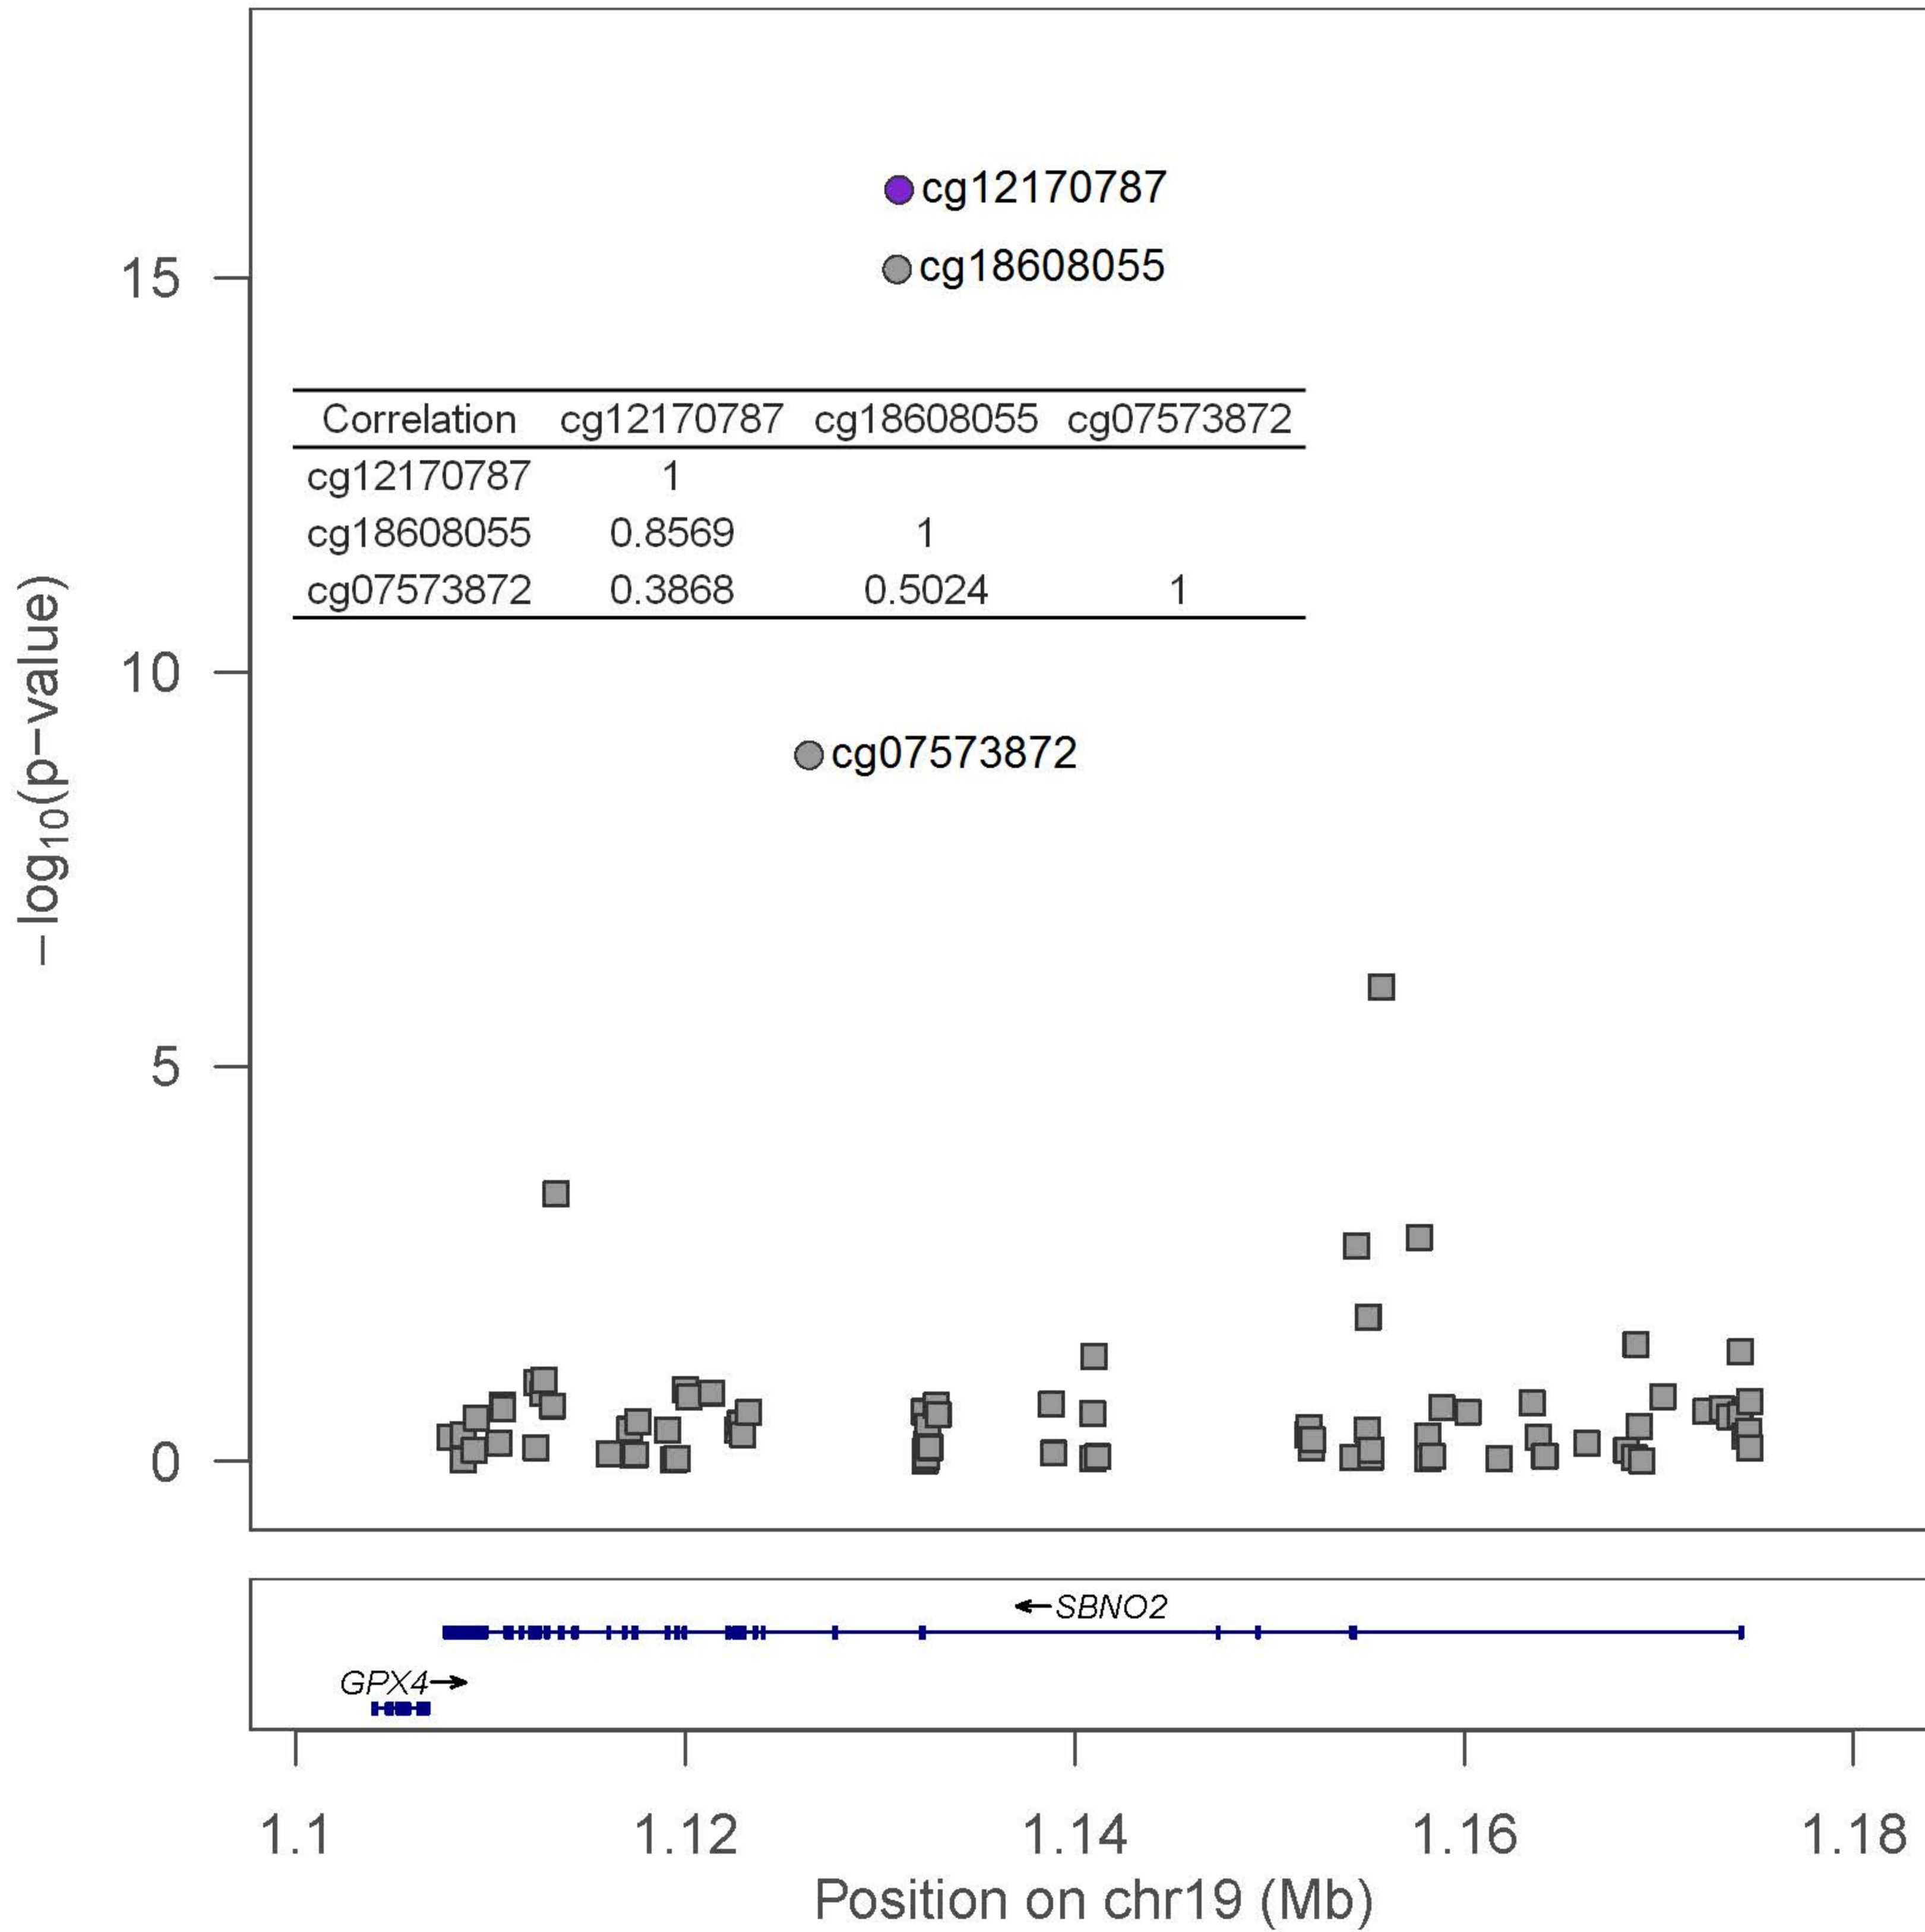

# CpG sites in SOCS3 gene

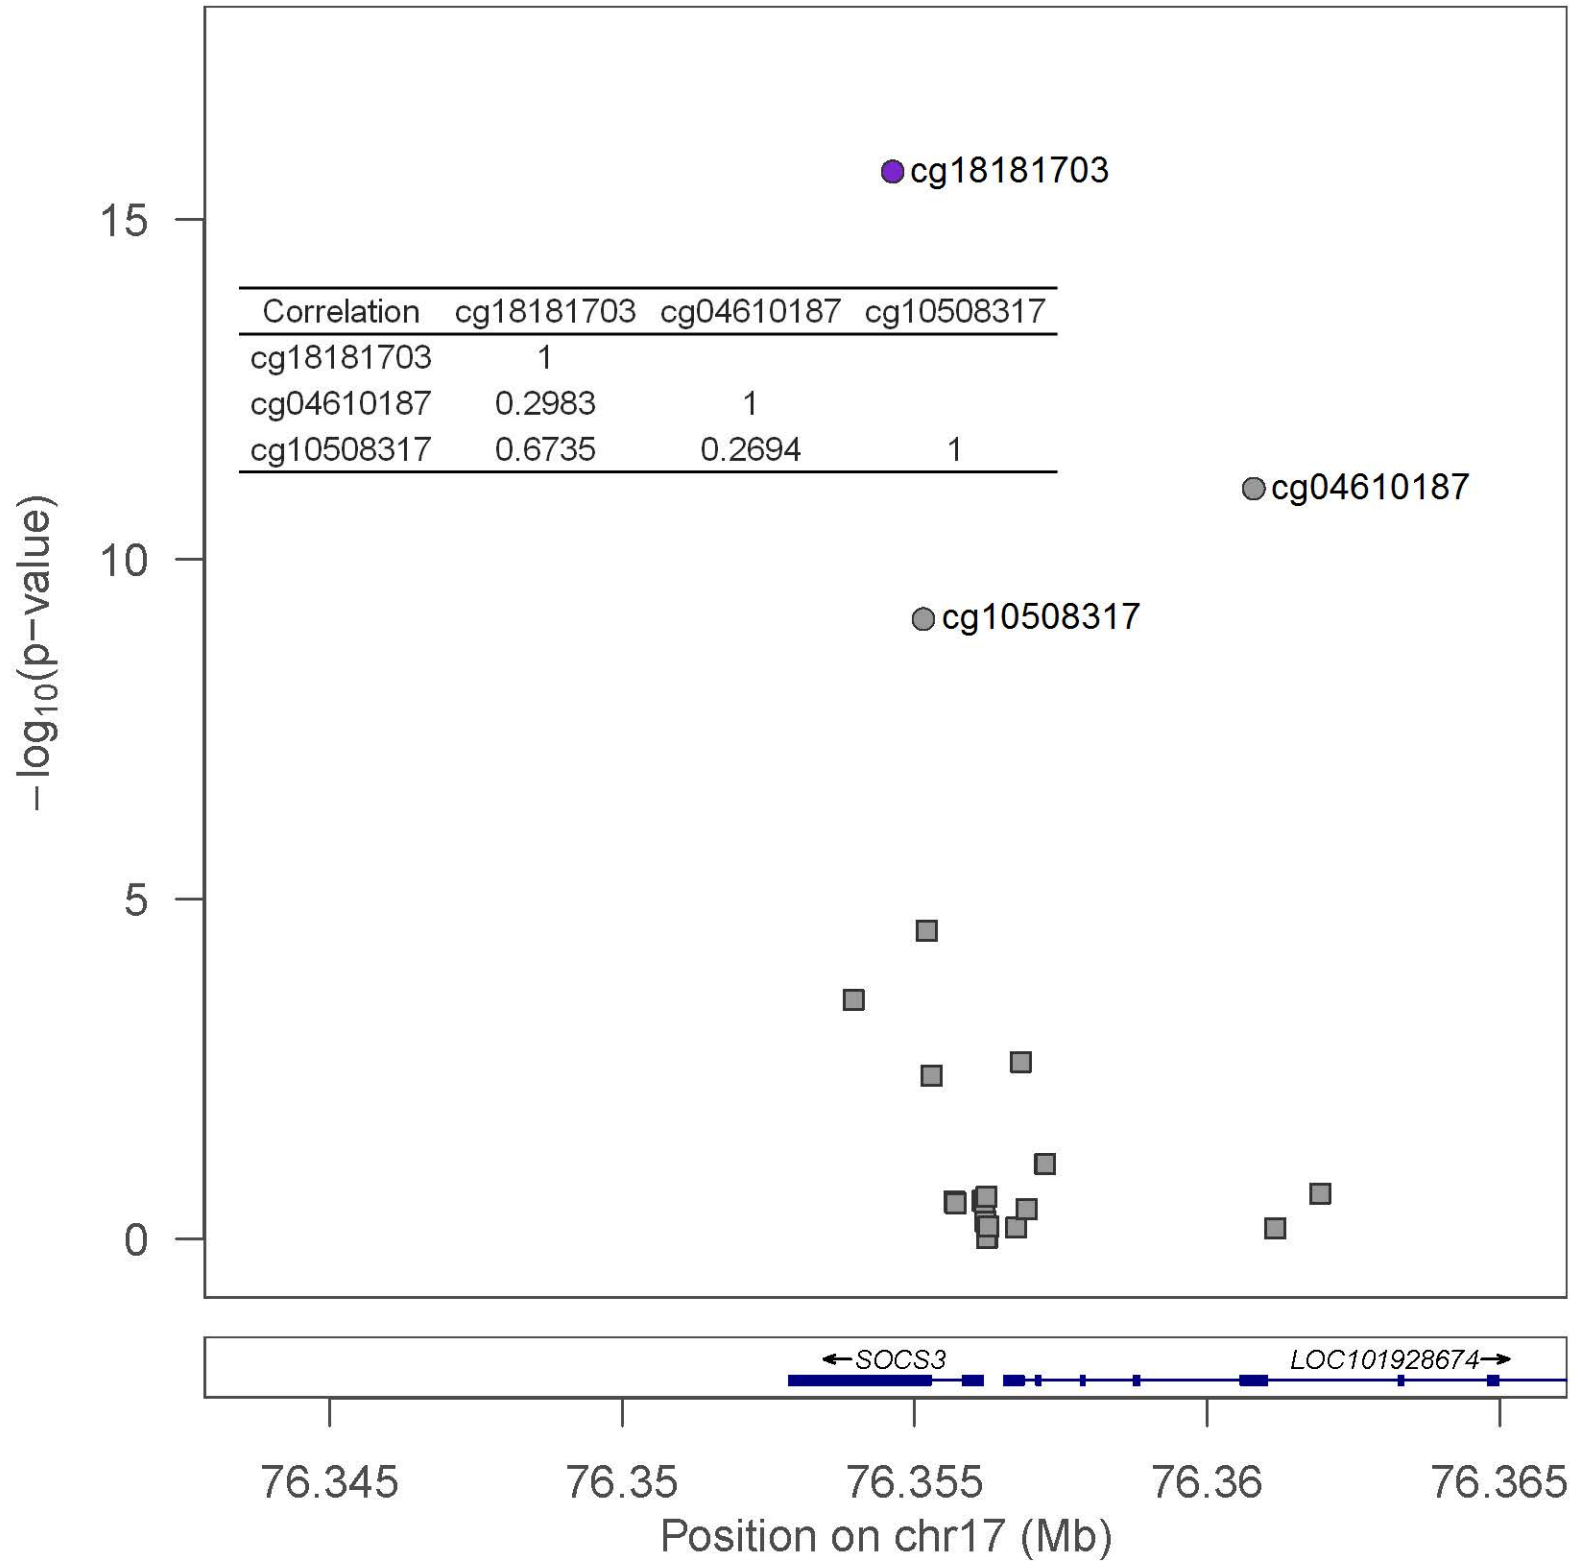

# CpG sites in VMP1 gene

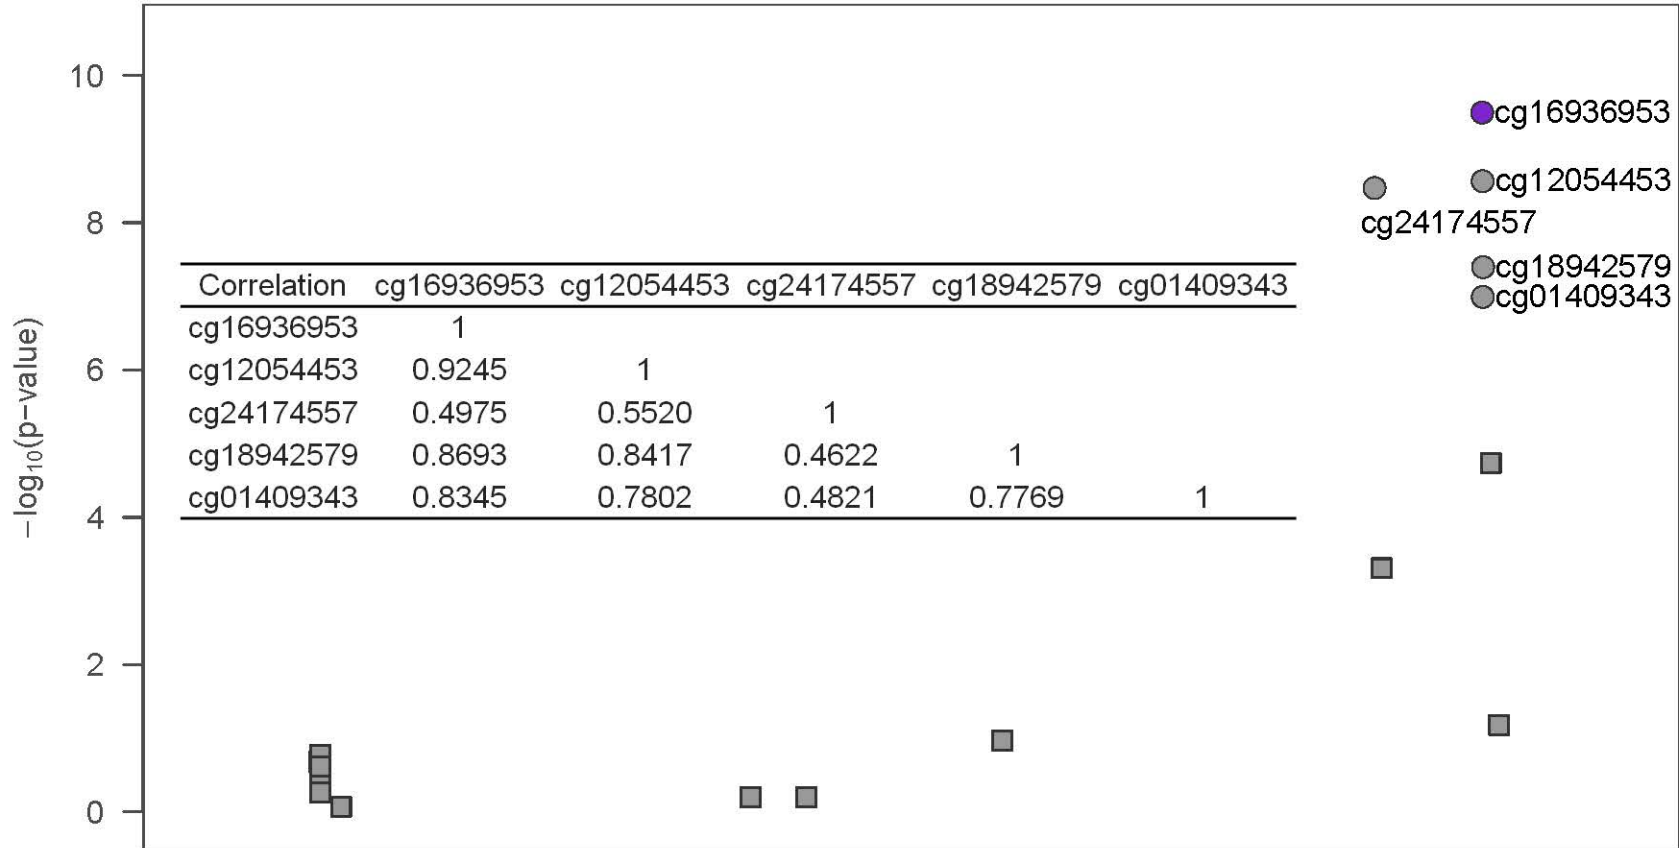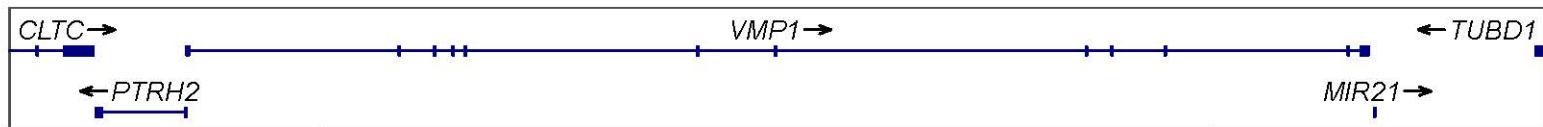

57.8

57.85

57.9

Position on chr17 (Mb)

# CpG sites in CISH gene

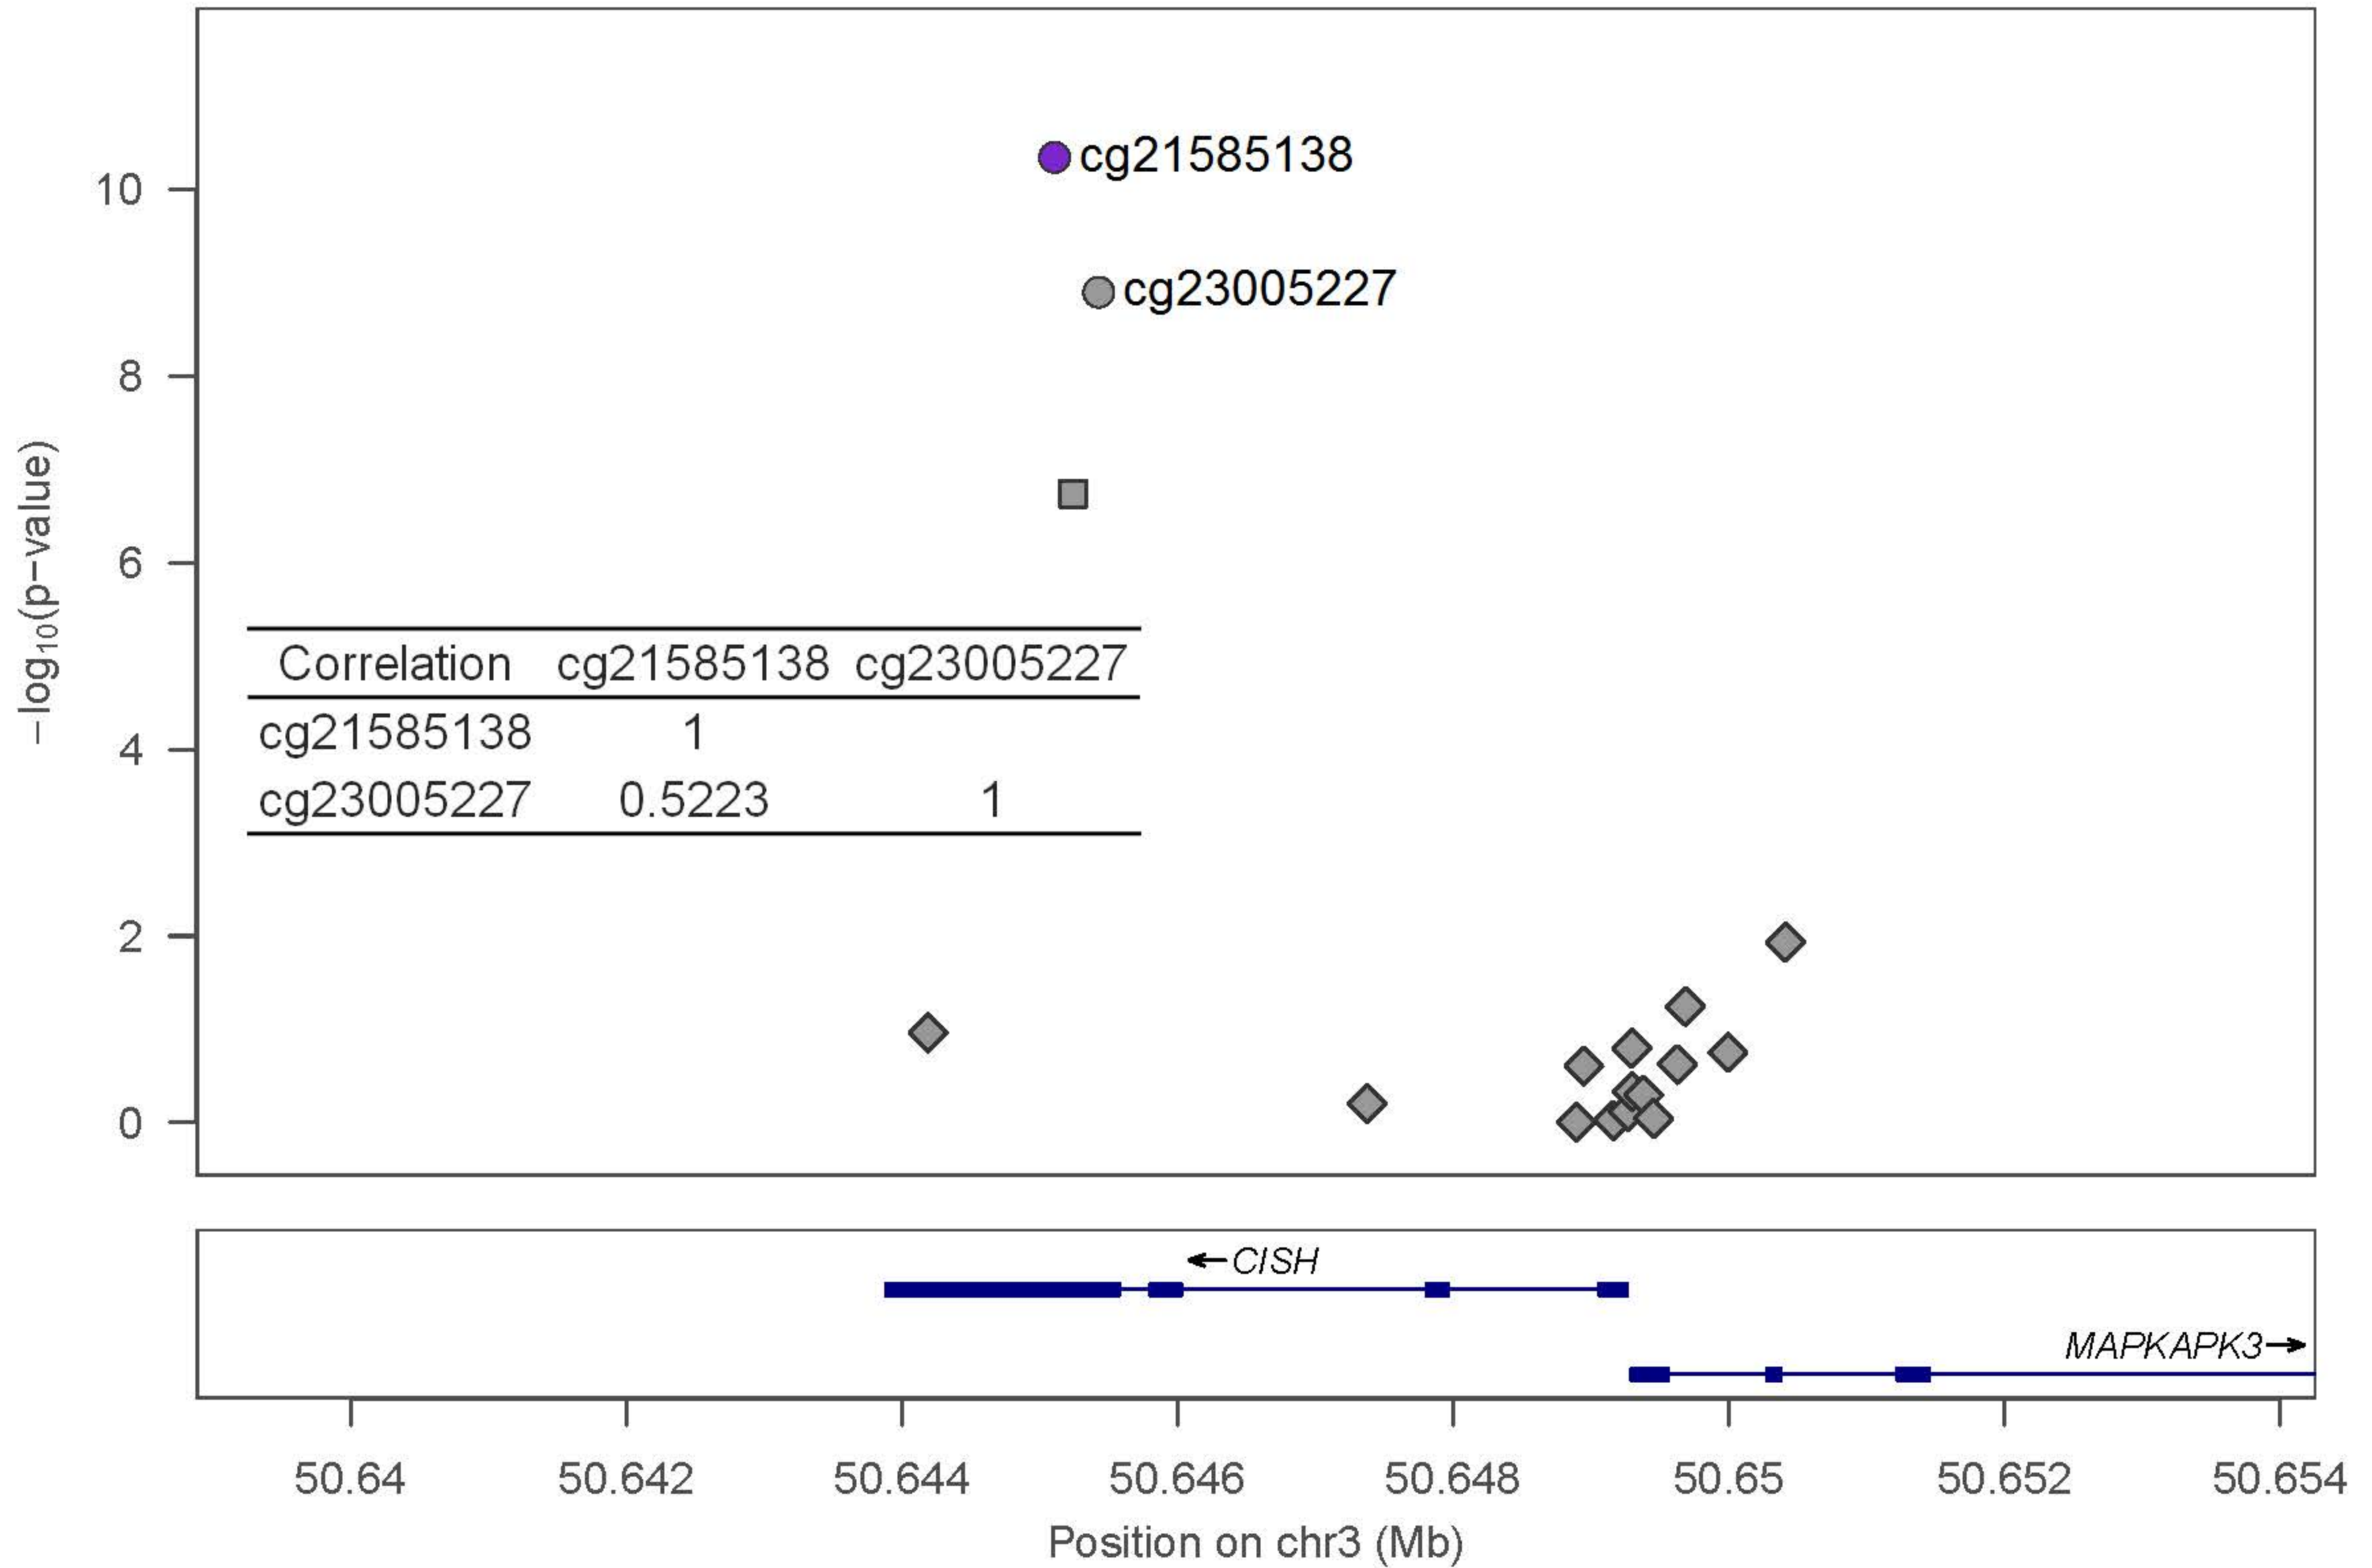

Supplement: 13148_2017_435_MOESM3_ESM.pdf [file 13148_2017_435_MOESM3_ESM.pdf]
